# Supplementary material for: A scoping review to identify opportunities and challenges for communities of South Asian (SA) origin in accessing mental health services and support in high- income countries
Source: Research Square preprint supplement (doi:10.21203/rs.3.rs-4798223/v1), 2024-07-30
Supplement: Supplementary file 1 [file 2f3197a63aa8400bba901d31.docx]

## **Table 1.** Keywords and search terms

| #1 | *Access* | (Access* OR “Acceptability” OR “availability” OR “accommodation” OR affordability OR appropriateness OR approachability) |
| --- | --- | --- |
| #2 | ***Mental health*** | (“mental health disorder*” OR “mental illness*” OR “mental health condition*” OR depress* OR “Anxiety”) |
| #3 | ***South Asia*** | (Afghani* OR Bangladesh* OR Bhutan* OR India* OR Maldives OR Nepal* OR Pakistan* OR Sri Lanka* OR South Asia* OR SA OR Afghani migrant OR Bangladeshi migrant OR Bhutanese migrant OR Indian migrant OR Maldives migrant OR Nepali migrant OR Pakistani migrant OR Sri Lankan migrant OR South Asian migrant) |
| #4 | ***Lived experiences and perceptions*** | (Experience* OR Enable* OR Perception* OR Attitude* OR View* OR Lived experience* OR Barrier* OR Facilitat* OR Challeng* OR Opportunit*) |
| #5 | ***Acceptable study design*** | (qualitative OR Exploratory qualitative stud* OR Interview OR focus group OR ethnography OR mixed methods) |
| #6 | ***High-income nations*** | ("Australia" OR "Canada" OR "United Kingdom" OR “UK” OR “United States of America” OR ”USA” OR “high income country” OR “high income nation” OR “high-income country” OR “high-income nation”) |

## **Table.2.** Key operational definitions

|  | **Definition** |
| --- | --- |
| **Health care access** | The definition of access to health care is adopted from the definition outlined by Graetz, Rechel, Groot, Norredam & Pavlova, 2017 (32), “the opportunity to reach and obtain appropriate health care services in situations of perceived need for care”. |
| **Mental health care** | Mental health care includes an array of diverse services and support at the primary and tertiary level |
| **Mental health disorder** | A disturbance in an individual’s emotional regulation, cognition and/or behaviour which is clinically significant (33) |
| **Mental health condition** | This encompasses the risk of self-harm, functional impairments, and disabilities that are psychosocial in nature alongside other mental states related to severe distress and mental health disorders (33) |
| **South Asia or South Asian** | The following eight nations, as per the South Asian Association for Regional Cooperation definition of SA: Afghanistan, Bangladesh, Bhutan, India, Maldives, Nepal, Pakistan, and Sri Lanka (7) |

## **Table 3:** Inclusion and exclusion criteria

| **Inclusion criteria** | - Qualitative data (in purely qualitative or mixed methods studies) |
| --- | --- |
| - Published in English |
| - Published between 1/1/2000 and 01/01/2023 |
| - Studies conducted in four high-income nations with large SA diasporas (UK, USA, Australia and Canada) |
| - Related to MH care access |
| - All ages and genders |
| - Specific to SA people (of all ages and regardless of migration) including individuals from one or more of the following eight nations as per the South Asian Association for Regional Cooperation definition of SA: Afghanistan, Bangladesh, Bhutan, India, Maldives, Nepal, Pakistan, and Sri Lanka (7) |
| - Studies with single-heritage SA populations (only SA people) or multi-heritage studies (more than one ethnic group included in the study) - Participants in these studies are individuals of all genders and ages who have |
| - Migrated from SA, of SA origin (regardless of cohort of migration) or self-identified SA background. |
| - Peer review |
| **Exclusion criteria** | - Non-English studies |
| - Quantitative data, |
| - Publications including letters to the editors, reviews, commentaries, and editorials |
| - Studies irrelevant to the study population or did not highlight SA-specific information amongst other study populations |
