# Supplementary material for: A scoping review to identify opportunities and challenges for communities of South Asian (SA) origin in accessing mental health services and support in high- income countries
Source: Research Square preprint supplement (doi:10.21203/rs.3.rs-4798223/v1), 2024-07-30
Supplement: Supplementary file 2 [file 964d0b6403a0239244c3ffd7.docx]

**Table 4:** *Overview of themes*

| Theme | Challenges | Opportunities |
| --- | --- | --- |
| Approachability | - Individual and service level stigma - Cultural shame - Limited MH literacy - Limited in-language resources | - Improving MH literacy - Deconstructing mistrust and stigma - Tailored opportunities for psychoeducation, - Service diversification - Multi-agency collaborations with communities |
| Acceptability | - Fears of stigmatising experiences with healthcare professionals - Service-user shame and mistrust - Lack of culturally appropriate explanatory models, models of care and cultural safety training affecting service accessibility | - Services fostering privacy and safe disclosure - Culturally aware, safe and sensitive practices |
| Availability and accommodation | - Referral delays - Post-referral disengagement - Limited quantity, quality, safety and continuity of care, - Limited transport | - Flexible, affordable, health insurance-eligible, - Local MH care - Multidisciplinary or coupled healthcare (addressing comorbidities) |
| Affordability | - Decreased female financial independence - Prohibitive or restrictive fees - Limited health insurance - Perceiving MH care as unproductive investments | - Free MH services, telephone helplines and accessible accessory support |
| Appropriateness | - Service-based racism and discrimination - Complexities of migration and acculturation - Dynamic acculturation | - Systemic and institutional changes to diversify and prioritise intersectional and person-centred approaches - Using community members’ preferred languages to validate heterogenous SA experiences - Utilising social networks - Improve MH literacy - Removal of deficit based approaches to MH care in SA communities |
